# Supplementary material for: A label-free electrochemical immunosensor based on an ionic organic molecule and chitosan-stabilized gold nanoparticles for the detection of cardiac troponin T
Source: Royal Society of Chemistry journal article supplement (doi:10.1039/c4an00993b), 2014-01-01
Supplement: c4an00993b1.pdf [file c4an00993b1.pdf]

## **Supplementary Information**

### **Label-free electrochemical immunosensor based on ionic organic molecule and chitosan-stabilized gold nanoparticles for the detection of cardiac troponin T**

Daniela Brondani,<sup>\*a</sup> Jamille Valéria Piovesan,<sup>b</sup> Eduard Westphal,<sup>c</sup> Hugo Gallardo,<sup>c</sup>  
Rosa Amalia Fireman Dutra,<sup>d</sup> Almir Spinelli,<sup>b</sup> Iolanda Cruz Vieira<sup>\*a</sup>

<sup>a</sup> *Laboratory of Biosensors, Department of Chemistry, Federal University of Santa Catarina, 88040-900, Florianópolis, SC, Brazil.*

*\*E-mail address: [danielabrondani@hotmail.com](mailto:danielabrondani@hotmail.com) (D. Brondani); [iolanda.vieira@ufsc.br](mailto:iolanda.vieira@ufsc.br) (I. C. Vieira). Phone: + 55 48 3721 6844; Fax: + 55 48 3721 6850.*

<sup>b</sup> *Group of Studies of Electrochemical and Electroanalytical Processes, Department of Chemistry, Federal University of Santa Catarina, 88040-900, Florianópolis, SC, Brazil.*

<sup>c</sup> *Laboratory of Synthesis of Liquid Crystals, Department of Chemistry, Federal University of Santa Catarina, 88040-900, Florianópolis, SC, Brazil.*

<sup>d</sup> *Biomedical Engineering Laboratory, Technology Center, Federal University of Pernambuco, 50670-901, Recife, PE, Brazil.*

## Synthesis and characterization of ionic organic molecule I-Py

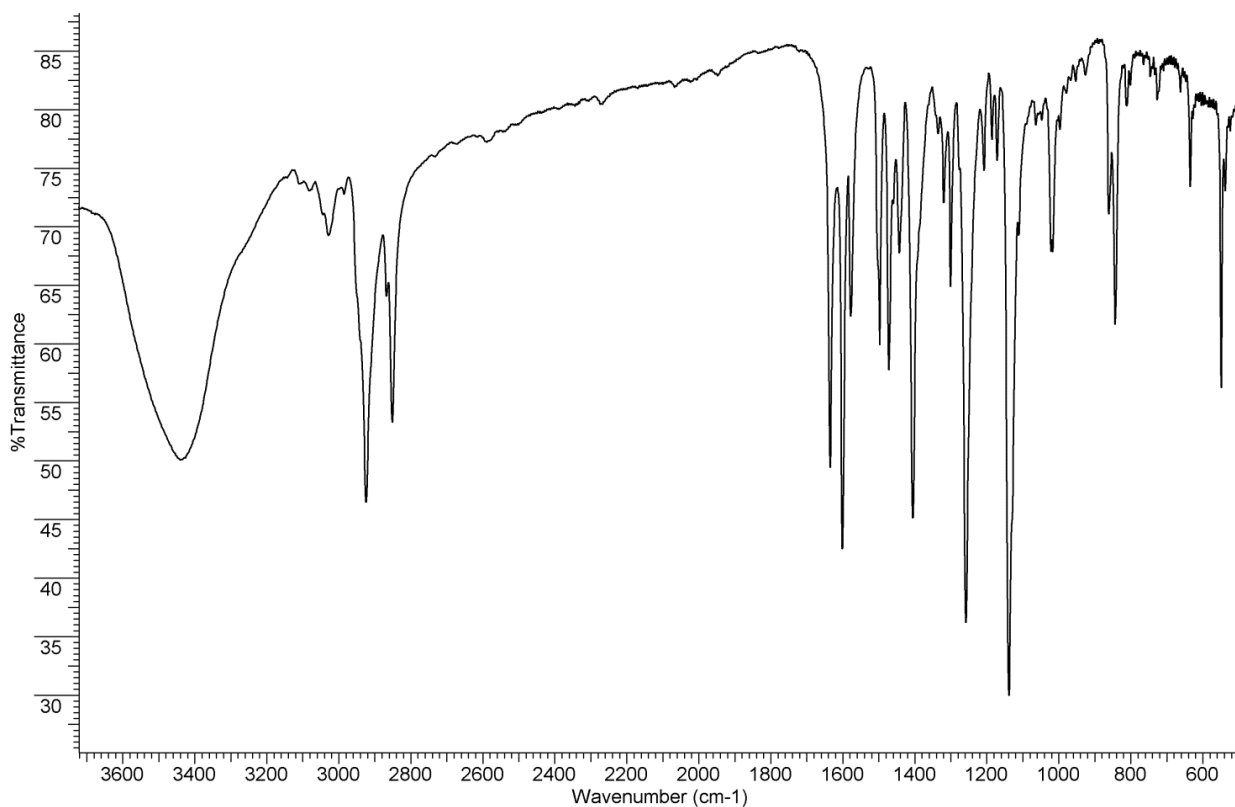

**Fig. S1.** IR spectrum for the ionic product **I-Py** in KBr.

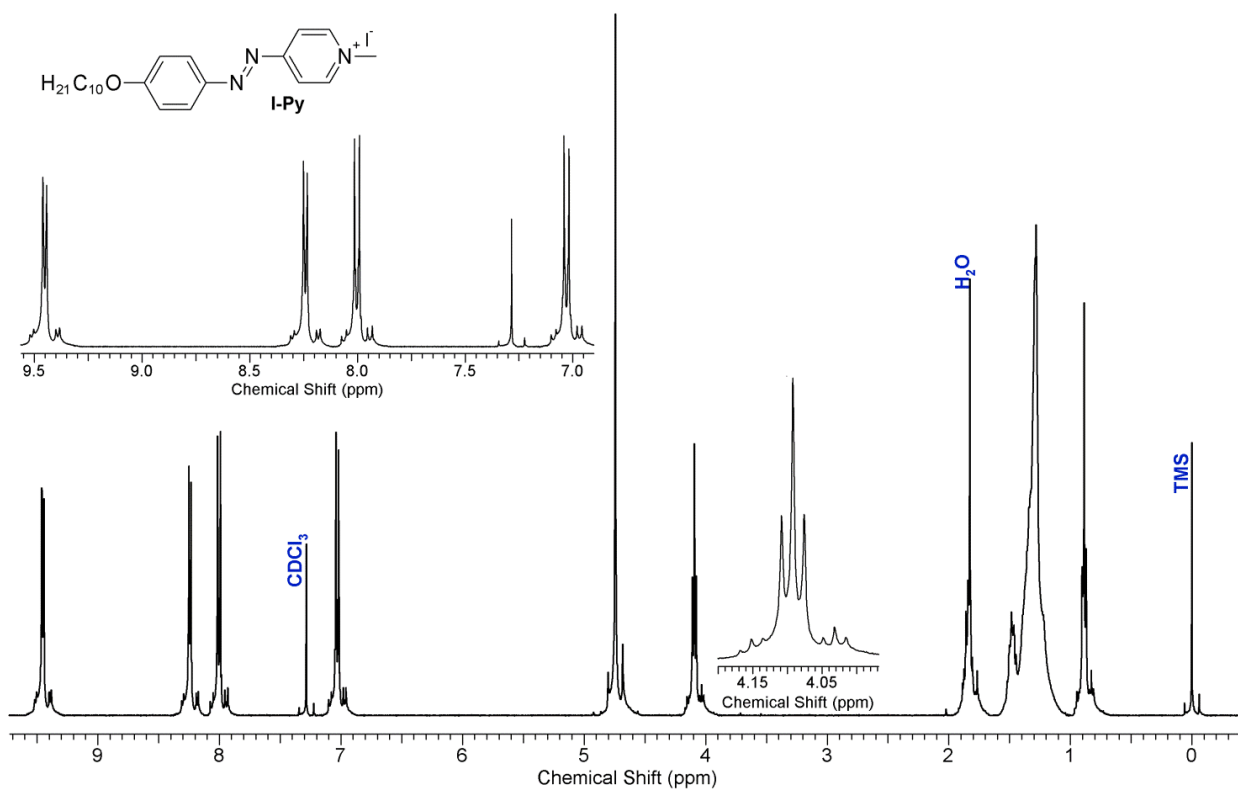

**Fig. S2.**  $^1\text{H}$  NMR (400 MHz) spectrum for the ionic product **I-Py** in  $\text{CDCl}_3$ .

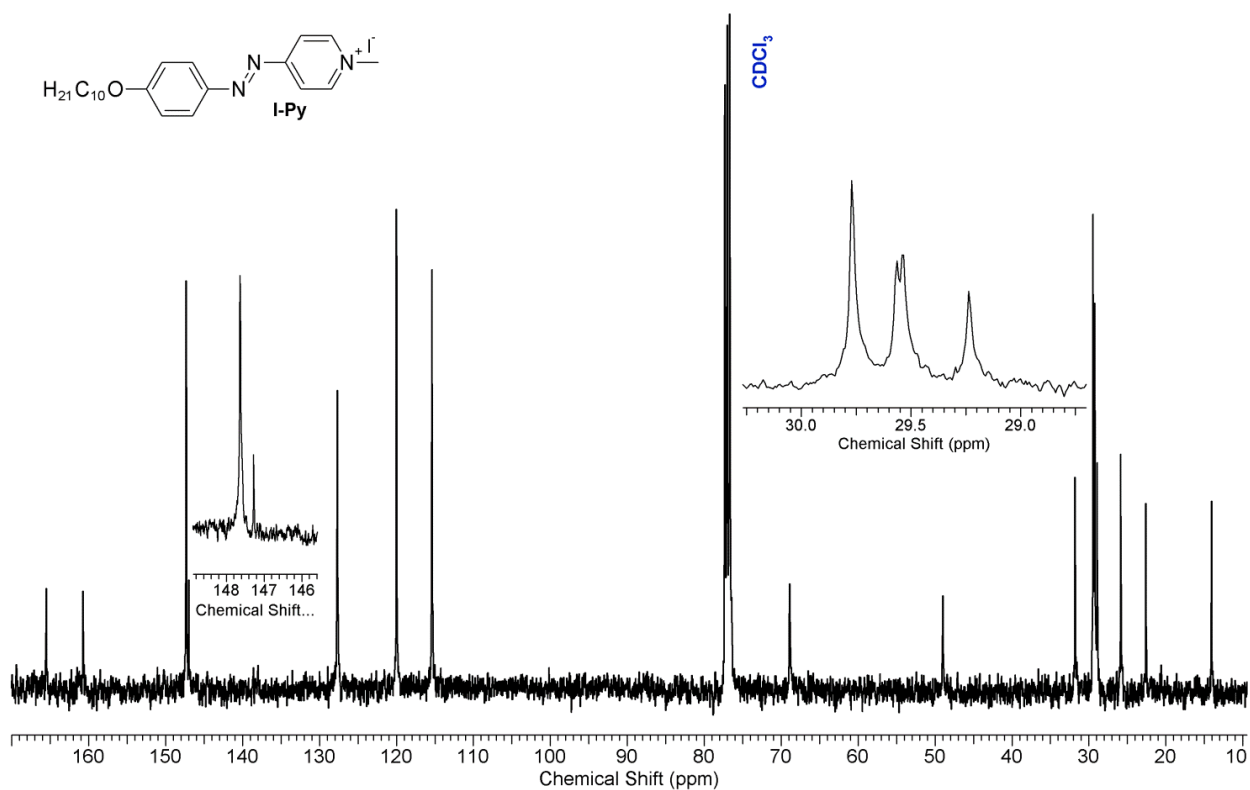

**Fig. S3.** <sup>13</sup>C NMR (100.6 MHz) spectrum for the ionic product **I-Py** in CDCl<sub>3</sub>.

### Thermal Characterization of **I-Py**

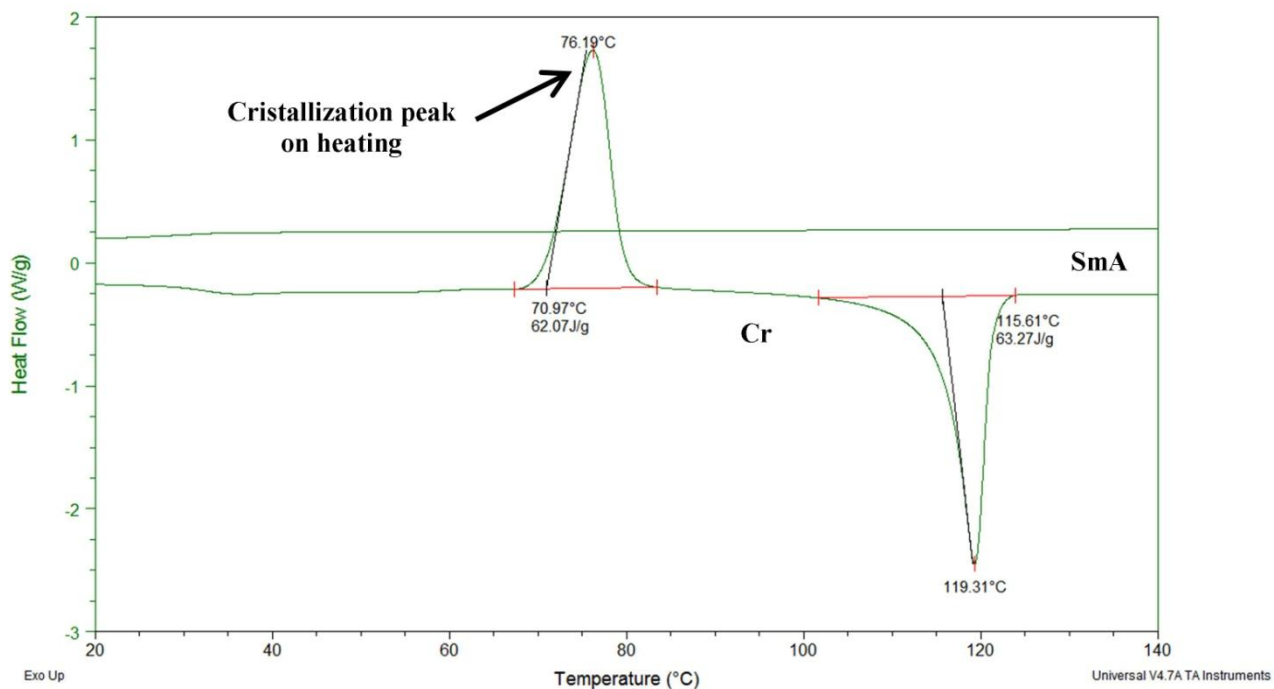

**Fig. S4.** Thermal transitions for the compound **I-Py** determined by DSC using a heating/cooling rate of 10 °C min<sup>-1</sup> and N<sub>2</sub> flow (50 mL min<sup>-1</sup>). The curves correspond to the first cooling and to the second heating scans.

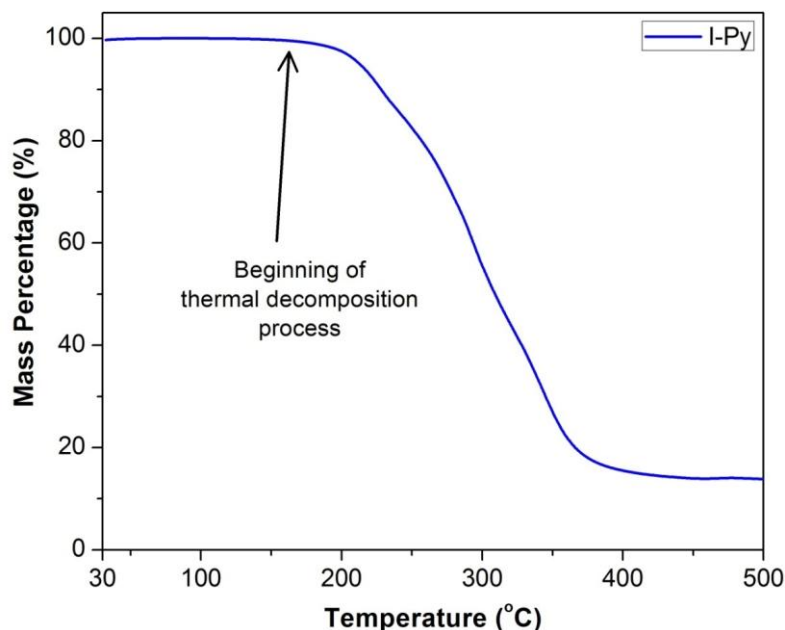

**Fig. S5.** Thermogravimetric analysis (TGA) plot for the ionic product **I-Py** under N<sub>2</sub> flow (20 mL min<sup>-1</sup>) with a heating rate of 10 °C min<sup>-1</sup>.

### Electrochemical behavior of ionic organic molecule **I-Py**

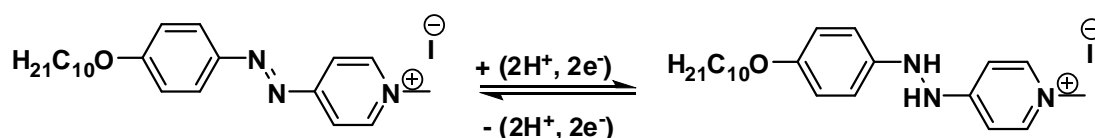

**Fig. S6.** Proposed chemical equation for the redox process of **I-Py**.

Figure S7-A shows the influence of the scan rate ( $\nu$ ) on the voltammetric profile for the **I-Py** modified electrode in phosphate buffer solution (pH 7.0, 0.1 mol L<sup>-1</sup>). The scan rate was varied from 10 to 300 mV s<sup>-1</sup>. The reaction is quasi-reversible because the potentials shifted with increasing scan rate. In addition, the cathodic current- $i_{pc}$  /anodic current- $i_{pa}$  ratio deviated slightly from 1.0. The currents of both peaks changed linearly with the square root of the scan rate (Fig. S7-B). The corresponding linear regression equations are  $i_{pa} / \mu\text{A} = -1.09 + 0.65 \nu^{1/2} / (\text{mV s}^{-1})^{1/2}$  ( $r^2 = 0.998$ ) and  $i_{pc} / \mu\text{A} = 1.47 - 0.87 \nu^{1/2} / (\text{mV s}^{-1})^{1/2}$  ( $r^2 = 0.990$ ). These results indicate that the redox reaction of **I-Py** is a diffusion-controlled process. Moreover, the plot of  $\log i_p$  vs.  $\log \nu$  (Fig. S7-C) exhibited a slope of 0.65 for the oxidation reaction and 0.87 for the reduction reaction, clearly indicating that the current for both reactions was diffusion-controlled with a contribution from adsorption.

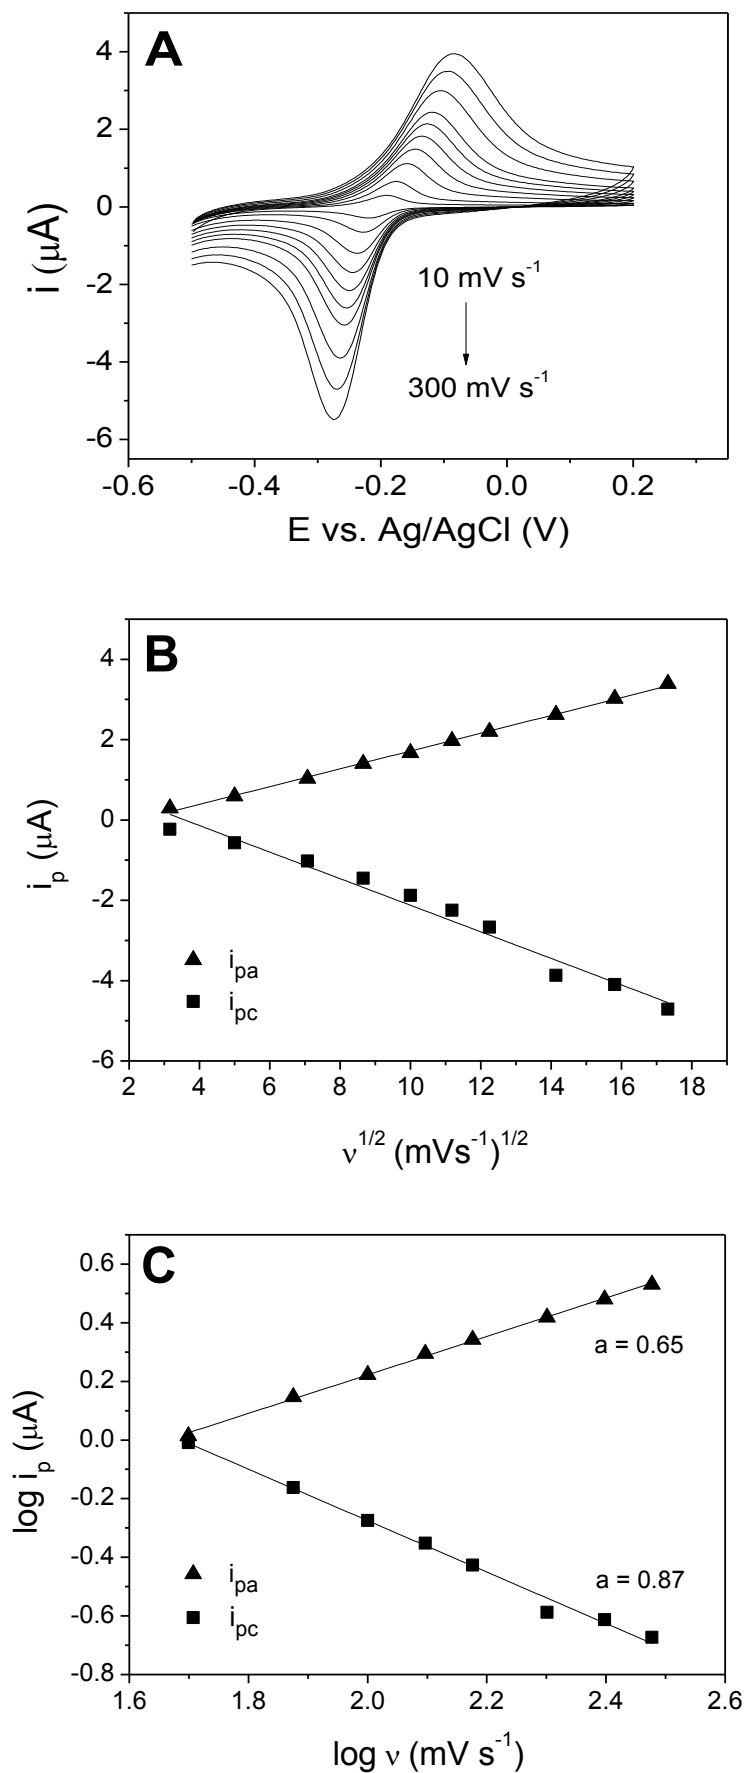

**Fig. S7.** (A) Cyclic voltammograms for I-Py sensor in  $0.1 \text{ mol L}^{-1}$  phosphate buffer (pH 7.0),  $v = 10$  a  $300 \text{ mV s}^{-1}$ ; (B) plot  $i_p$  vs.  $v^{1/2}$ ; (C) plot  $\log i_p$  vs.  $\log v$ .

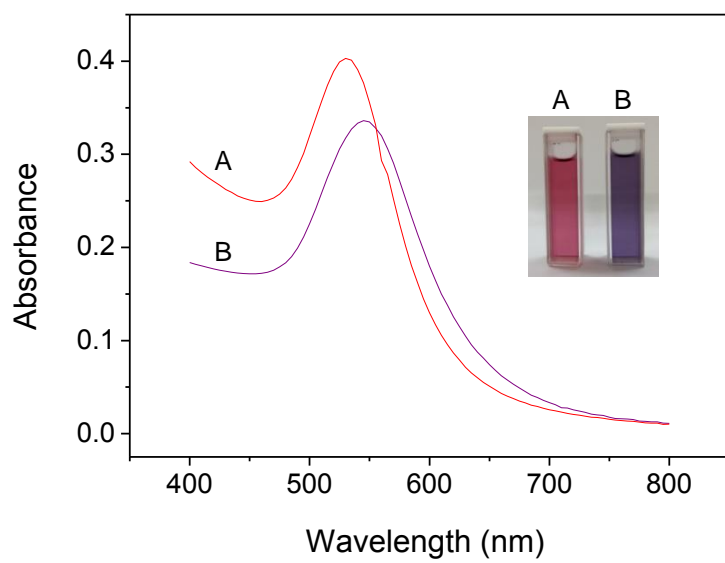

**Fig. S8.** UV-vis spectra of the CTS-stabilized AuNP (A) before and (B) after addition of anti-cTnT.
